# Supplementary material for: Adsorption of 5-fluorouracil, an anticancer drug, in faujasite-type zeolites: understanding storage and release with density functional theory calculations
Source: Royal Society of Chemistry journal article supplement (doi:10.1039/d4ce00344f), 2024-01-01
Supplement: d4ce00344f1.pdf [file d4ce00344f1.pdf]

## **Adsorption of 5-fluorouracil, an anticancer drug, in faujasite-type zeolites: Understanding storage and release with density functional theory calculations**

**Michael Fischer**

Crystallography & Geomaterials Research, Faculty of Geosciences, University of Bremen,  
Klagenfurter Straße 2-4, 28359 Bremen, Germany

Bremen Center for Computational Materials Science and MAPEX Center for Materials and  
Processes, University of Bremen, 28359 Bremen, Germany

E-Mail: michael.fischer@uni-bremen.de

### **SUPPORTING INFORMATION**

**S1.1 – Monte Carlo simulations**

**S1.2 – Simulated annealing**

**S1.3 – Force field parameters**

**S1.4 – Calculation of internal energy of adsorption**

**S2.1 – Adsorption energies of individual configurations**

**S2.2 – Internal energies of adsorption**

**S2.3 – Visualisation of additional low-energy configurations**

**S2.4 – RDFs obtained from AIMD simulations of 5-FU@FAU**

**S2.5 – Partial charges of 5-FU**

**S2.6 – Intramolecular bond distances and vibrational modes**

**S2.7 – Initial structures used in AIMD simulations of (5-FU+16H<sub>2</sub>O)@FAU**

**S2.8 – RDFs obtained from AIMD simulations of (5-FU+16H<sub>2</sub>O)@FAU**

**S2.9 – RDFs obtained from AIMD simulations of 5-FU in water**

**References**

## S1.1 – Monte Carlo simulations

The Monte Carlo simulations were carried out using the *Sorption* module included in *Materials Studio* (DS BIOVIA). To generate starting configurations of 5-FU in different zeolite models, fixed-loading simulations (*NVT* ensemble) were performed for a loading of one 5-FU molecule per unit cell. Relevant simulation settings (except force field parameters, which are discussed in S1.3) are compiled in **Table S1**.

**Table S1:** Overview of settings used in fixed-loading MC simulations

|                            |                                                                                           |
|----------------------------|-------------------------------------------------------------------------------------------|
| Loading                    | 1 5-FU per cell                                                                           |
| Temperature                | 298 K                                                                                     |
| Sampling method            | Metropolis                                                                                |
| # equilibration steps      | 500,000                                                                                   |
| # production steps         | 2,000,000                                                                                 |
| Step probability           | Exchange:Translation:Rotation:Regrowth: 2:1:1:0.1                                         |
| Electrostatic interactions | Ewald & Group summation<br>Ewald accuracy: 0.001 kcal/mol<br>Cutoff: 12.5 Å               |
| Van der Waals interactions | Atom-based summation<br>Cutoff: 12.5 Å<br>Spline-based truncation, cubic spline width 1 Å |

Five independent MC simulations were run for each adsorbent model. 20 low-energy configurations and 20 additional snapshots were extracted from the production stage of each simulation. The 5-FU positions of all configurations were optimised using the *Forcite* module of *Materials Studio*, employing “ultra-fine” optimisation settings. Between 3 and 10 distinct configurations were then selected as input for the DFT optimisations. In the labels of the configurations used in **Table S4**, which are of the kind ConfigX (with X = 1, 2...), the ordering follows the adsorption energy obtained from the FF-based optimisations.

## S1.2 – Simulated annealing

To study the co-adsorption of water, 16 H<sub>2</sub>O molecules were added to pre-optimised low-energy 5-FU@FAU models. These simulations employed the *Adsorption Locator* module of *Materials Studio*. This module uses a simulated annealing procedure based on a series of MC simulations during which the temperature is decreased from a very high starting value to low temperature in order to probe different local minima. Each simulated annealing run consisted of 20 cycles, with 100,000 simulation steps per cycle. During each cycle, the temperature was gradually decreased from 100,000 to 100 K. Force field parameters and other settings were largely analogous to those reported above for the MC simulations. To ensure that the H<sub>2</sub>O molecules are adsorbed in the vicinity of the 5-FU molecule, additional constraints fixing the “adsorption distance” (maximal distance between 5-FU and each adsorbed H<sub>2</sub>O molecule) to 6 Å were enforced. At least three independent simulated annealing runs were performed for each adsorbent model of interest. At the end of each annealing cycle, the positions of the H<sub>2</sub>O molecules were optimised, using parameters and settings as described above for the MC simulations. Out of the at least 60 configurations generated in this way, low-energy configurations were selected as starting point for the AIMD simulations (**Figure S7 to S9**).

### S1.3 – Force field parameters

5-FU and H<sub>2</sub>O molecules were represented using default parameters from the PCFF force field that are distributed with *Materials Studio* (Table S3).<sup>1</sup> PCFF uses 9-6 Lennard-Jones (LJ) potentials and a 6<sup>th</sup>-power combination rule.<sup>2</sup> Regarding the zeolite frameworks, partial charges and LJ parameters proposed by Emami et al. were employed for Si atoms and O atoms of Si–O–Si linkages.<sup>3</sup> In the view of the identical number of electrons of Si<sup>4+</sup> and Al<sup>3+</sup> cations, the LJ parameters of Si were also used for framework Al atoms. LJ parameters originally proposed for O<sub>Si–O–Si</sub> atoms were also used for O<sub>Si–O–Al</sub> atoms, and LJ parameters for hydrogen atoms of silanol groups derived in the work of Emami et al. were assigned to the framework protons.

While it seems plausible to assume that the LJ parameters are not heavily affected by moderate differences in the atomic environment, new partial charges had to be derived for those species present in aluminosilicate zeolites that were not covered in the study of Emami et al., specifically, framework protons, Al atoms, and oxygen atoms of AlO<sub>4</sub> tetrahedra. For this purpose, the following stepwise approach was used:

- A DFT single-point calculation for the GULP-optimised structure of H-FAU\_1H was performed using the *CP2K* code, employing settings analogous to those described in the main manuscript. The calculation of charges based on the electrostatic potential in the framework of the REPEAT method<sup>4</sup> was activated with the flag &USE\_REPEAT\_METHOD in the block &FORCE\_EVAL &PROPERTIES &RESP of the *CP2K* input.
- In order to ensure that the same charges are assigned to atoms with an identical environment, EQUAL\_CHARGES constraints were enforced for a) all Si atoms, b) O atoms of Si–O–Si links, c) O atoms of unprotonated Si–O–Al links.
- The REPEAT calculation resulted in  $q(\text{Si}) = 0.826 e$  and  $q(\text{O}_{\text{Si–O–Si}}) = -0.413 e$ . Since the charge values of these atom types should correspond to those proposed by Emami et al. ( $q(\text{Si}) = 1.10 e$  and  $q(\text{O}_{\text{Si–O–Si}}) = -0.55 e$ ), a scaling factor of  $1.10/0.826 \approx 1.332$  was used to rescale the REPEAT charges for all species ( $q_{\text{scaled}}$ ). Finally, the charges of some atoms were slightly adjusted (in the 2<sup>nd</sup> or 3<sup>rd</sup> digit) to result in overall charge neutrality ( $q_{\text{adjusted}}$ ). Table S2 provides REPEAT charges, scaled charges, and adjusted charges for the zeolite framework atoms.

**Table S2:** Results of charge derivation procedure based on REPEAT calculations.

| Species                               | $q_{\text{REPEAT}}$ [e] | $q_{\text{scaled}}$ [e] | $q_{\text{adjusted}}$ [e] |
|---------------------------------------|-------------------------|-------------------------|---------------------------|
| Si                                    | 0.826                   | 1.100                   | 1.100                     |
| Al                                    | 0.853                   | 1.136                   | 1.130                     |
| O <sub>Si–O–Si</sub>                  | -0.413                  | -0.550                  | -0.550                    |
| O <sub>Si–O–Al</sub> (not protonated) | -0.533                  | -0.710                  | -0.720                    |
| O <sub>Si–O–Al</sub> (protonated)     | -0.387                  | -0.515                  | -0.510                    |
| H                                     | 0.332                   | 0.442                   | 0.440                     |

**Table S3:** Atom types and non-bonded PCFF parameters used in force field calculations. 5-FU atom labels correspond to those shown in **Figure 1** of the main paper. Partial charges  $q$  and Lennard-Jones parameters  $R_0$  and  $D_0$  are given for each atom. NI (no interaction) indicates that only a partial charge, but no LJ potentials were assigned to this atom.

| 5-FU molecule                            | Atom type (PCFF) | $q$ [e] | $R_0$ [Å] | $D_0$ [kcal mol <sup>-1</sup> ] |
|------------------------------------------|------------------|---------|-----------|---------------------------------|
| C2                                       | c_2              | 0.807   | 3.81      | 0.120                           |
| C4                                       | c_1              | 0.642   | 3.81      | 0.120                           |
| C5                                       | c=1              | 0.130   | 4.01      | 0.064                           |
| C6                                       | c=               | -0.0268 | 3.90      | 0.064                           |
| N1                                       | n_2              | -0.589  | 3.60      | 0.106                           |
| N3                                       | n_2              | -0.600  | 3.60      | 0.106                           |
| O2                                       | o_1              | -0.585  | 3.30      | 0.267                           |
| O4                                       | o_1              | -0.531  | 3.30      | 0.267                           |
| F                                        | f                | -0.130  | 3.20      | 0.0598                          |
| H1, H3                                   | hn2              | 0.378   | 1.65      | 0.013                           |
| H6                                       | hc               | 0.1268  | NI        | NI                              |
| <b>H<sub>2</sub>O molecule</b>           |                  |         |           |                                 |
| O                                        | o*               | -0.7982 | 3.608     | 0.274                           |
| H                                        | hw               | 0.3991  | 1.098     | 0.013                           |
| <b>Zeolite</b>                           |                  |         |           |                                 |
| Si                                       | sz               | 1.100   | 4.20      | 0.080                           |
| Al                                       | az               | 1.130   | 4.20      | 0.080                           |
| O <sub>Si-O-Si</sub>                     | oss              | -0.550  | 3.60      | 0.040                           |
| O <sub>Si-O-Al</sub><br>(not protonated) | oas              | -0.720  | 3.60      | 0.040                           |
| O <sub>Si-O-Al</sub><br>(protonated)     | ob               | -0.510  | 3.60      | 0.040                           |
| H                                        | hb               | 0.440   | 1.098     | 0.013                           |

## S1.4 – Calculation of internal energy of adsorption

For adsorption of 5-FU in a given FAU model, the internal energy of adsorption was computed as:

$$\Delta U_{ads} = \langle \bar{E}_{5FU@FAU} \rangle_{3tr} - \langle \bar{E}_{FAU} \rangle_{3tr} - \langle \bar{E}_{5FU} \rangle_{3t}$$

Here, the terms in brackets correspond to the averages over the total energies (sum of potential and kinetic energy) obtained from the production stages of the AIMD simulations ( $T = 298$  K) for the 5-FU@FAU model, the guest-free zeolite, and for 5-FU in a box. The index “3tr” highlights that these averages were computed over the three independent trajectories (4 trajectories were computed for 5-FU@SiO<sub>2</sub>-FAU, see main text). In order to estimate error bars for the internal energies of adsorption,  $\Delta U_{ads}$  values were recomputed using only 2 trajectories for each system, considering all possible permutations. Of these, the combination resulting in the most negative internal energy of adsorption (*i.e.*, most negative  $\langle \bar{E}_{5FU@FAU} \rangle_{2tr}$ , least negative  $\langle \bar{E}_{FAU} \rangle_{2tr}$  and  $\langle \bar{E}_{5FU} \rangle_{2tr}$ ) was taken as upper boundary value  $\Delta U_{ads,max}$  and the one giving the least negative internal energy of adsorption (*i.e.*, least negative  $\langle \bar{E}_{5FU@FAU} \rangle_{2tr}$ , most negative  $\langle \bar{E}_{FAU} \rangle_{2tr}$  and  $\langle \bar{E}_{5FU} \rangle_{2tr}$ ) was taken as lower boundary value  $\Delta U_{ads,min}$ .

## S2.1 – Adsorption energies of individual configurations

**Table S4:** DFT adsorption energies computed for individual configurations with DZVP and TZVP basis sets. For each FAU model, the lowest-energy configuration according to TZVP calculations is highlighted in bold. The last column lists hydrogen bonds (having bond distances  $\leq 2.5$  Å) and, where applicable, the occurrence of framework deprotonation.

| 5FU@...                    | $\Delta E_{ads}$ (DZVP)<br>[kJ mol <sup>-1</sup> ] | $\Delta E_{ads}$ (TZVP)<br>[kJ mol <sup>-1</sup> ] | Comments                                                                                    |
|----------------------------|----------------------------------------------------|----------------------------------------------------|---------------------------------------------------------------------------------------------|
| <b>SiO<sub>2</sub>-FAU</b> |                                                    |                                                    |                                                                                             |
| Config1                    | -84.9                                              | -72.8                                              | No H-bond                                                                                   |
| <b>Config2</b>             | <b>-83.3</b>                                       | <b>-73.2</b>                                       | H-bond: H1...O <sub>fw</sub>                                                                |
| Config3                    | -80.9                                              | -66.7                                              | No H-bond                                                                                   |
| Config4                    | -71.3                                              | -64.6                                              | H-bond: H3...O <sub>fw</sub>                                                                |
| Config5                    | -67.0                                              | -60.4                                              | H-bond: H3...O <sub>fw</sub>                                                                |
| Config6                    | -68.4                                              | -60.7                                              | H-bond: H3...O <sub>fw</sub>                                                                |
| <b>H-FAU_1H</b>            |                                                    |                                                    |                                                                                             |
| Config1                    | -154.9                                             | -134.4                                             | Deprotonation: H <sub>fw</sub> @O2;<br>H-bond: H3...O <sub>fw</sub>                         |
| <b>Config2</b>             | <b>-164.5</b>                                      | <b>-144.0</b>                                      | Deprotonation: H <sub>fw</sub> @O4;<br>H-bond: H3...O <sub>fw</sub>                         |
| Config3                    | -131.8                                             | -121.7                                             | H-bonds: H <sub>fw</sub> ...O2, H3...O <sub>fw</sub>                                        |
| Config4                    | -143.1                                             | -127.6                                             | H-bond: H <sub>fw</sub> ...O2                                                               |
| Config5                    | -158.3                                             | -131.3                                             | Deprotonation: H <sub>fw</sub> @O2                                                          |
| Config6                    | -127.3                                             | -110.9                                             | H-bonds: H <sub>fw</sub> ...O4, H3...O <sub>fw</sub>                                        |
| <b>H-FAU_2H_1_3</b>        |                                                    |                                                    |                                                                                             |
| <b>Config1</b>             | <b>-196.0</b>                                      | <b>-179.2</b>                                      | H-bonds: H <sub>fw</sub> ...O2, H <sub>fw</sub> ...O4,<br>H1...O <sub>fw</sub>              |
| Config2                    | -185.1                                             | -165.8                                             | H-bonds: H <sub>fw</sub> ...O2, H <sub>fw</sub> ...O4,<br>H1...O <sub>fw</sub>              |
| Config3                    | -169.9                                             | -154.5                                             | Deprotonation: H <sub>fw</sub> @O4;<br>H-bonds: H1...O <sub>fw</sub> , H3...O <sub>fw</sub> |
| <b>H-FAU_2H_1_4</b>        |                                                    |                                                    |                                                                                             |
| Config1                    | -206.3                                             | -188.7                                             | H-bonds: H <sub>fw</sub> ...O2, H <sub>fw</sub> ...O4,<br>H1...O <sub>fw</sub>              |
| <b>Config2</b>             | <b>-205.9</b>                                      | <b>-188.9</b>                                      | H-bonds: H <sub>fw</sub> ...O2, H <sub>fw</sub> ...O4,<br>H1...O <sub>fw</sub>              |
| Config3                    | -185.4                                             | -168.0                                             | H-bonds: H <sub>fw</sub> ...O2, H <sub>fw</sub> ...O4,<br>H1...O <sub>fw</sub>              |
| <b>H-FAU_3H</b>            |                                                    |                                                    |                                                                                             |
| Config1                    | -188.8                                             | -171.8                                             | H-bonds: H <sub>fw</sub> ...O2, H <sub>fw</sub> ...O4,<br>H1...O <sub>fw</sub>              |
| Config2                    | -165.9                                             | -152.4                                             | H-bonds: H <sub>fw</sub> ...O2, H <sub>fw</sub> ...O4                                       |
| Config3                    | -192.8                                             | -173.9                                             | H-bonds: H <sub>fw</sub> ...O2, H <sub>fw</sub> ...O4                                       |
| Config4                    | -172.6                                             | -158.8                                             | H-bonds: H <sub>fw</sub> ...O2, H <sub>fw</sub> ...O4,<br>H1...O <sub>fw</sub>              |
| <b>Config5</b>             | <b>-193.2</b>                                      | <b>-177.3</b>                                      | H-bonds: H <sub>fw</sub> ...O2, H <sub>fw</sub> ...O4,<br>H1...O <sub>fw</sub>              |
| Config6                    | -175.0                                             | -153.4                                             | H-bonds: H <sub>fw</sub> ...O2, H <sub>fw</sub> ...O4                                       |
| Config7                    | -188.8                                             | -162.3                                             | H-bonds: H <sub>fw</sub> ...O2, H <sub>fw</sub> ...O4                                       |
| Config8                    | -168.8                                             | -153.1                                             | H-bonds: H <sub>fw</sub> ...O2, H <sub>fw</sub> ...O4,<br>H3...O <sub>fw</sub>              |

|                      |               |               |                                                                                                       |
|----------------------|---------------|---------------|-------------------------------------------------------------------------------------------------------|
| <b>H-FAU_16H</b>     |               |               |                                                                                                       |
| Config1              | -155.9        | -142.1        | H-bonds: H <sub>fw</sub> ···O2, H3···O <sub>fw</sub>                                                  |
| Config2              | -157.6        | -144.2        | H-bonds: H <sub>fw</sub> ···O4, H1···O <sub>fw</sub> ,<br>H3···O <sub>fw</sub>                        |
| Config3              | -147.0        | -135.5        | H-bonds: H <sub>fw</sub> ···O2, H3···O <sub>fw</sub>                                                  |
| Config4*             | -158.6        | -143.2        | H-bonds: H <sub>fw</sub> ···O2, H <sub>fw</sub> ···O4,<br>H3···O <sub>fw</sub>                        |
| Config5              | -160.3        | -142.5        | H-bonds: H <sub>fw</sub> ···O4, H3···O <sub>fw</sub>                                                  |
| <b>Config6</b>       | <b>-165.3</b> | <b>-148.3</b> | Deprotonation: H <sub>fw</sub> @O2;<br>H-bond: H3···O <sub>fw</sub>                                   |
| Config7              | -136.8        | -126.6        | H-bonds: H <sub>fw</sub> ···O4, H1···O <sub>fw</sub>                                                  |
| <b>H-FAU_32H_1_3</b> |               |               |                                                                                                       |
| Config1              | -198.5        | -183.8        | H-bonds: H <sub>fw</sub> ···O2, H <sub>fw</sub> ···O4,<br>H1···O <sub>fw</sub>                        |
| Config2              | -188.1        | -175.0        | H-bonds: H <sub>fw</sub> ···O2, H <sub>fw</sub> ···O4,<br>H1···O <sub>fw</sub>                        |
| Config3              | -193.1        | -177.6        | H-bonds: H <sub>fw</sub> ···O2, H <sub>fw</sub> ···O4,<br>H1···O <sub>fw</sub>                        |
| <b>Config4</b>       | <b>-197.2</b> | <b>-184.3</b> | H-bonds: H <sub>fw</sub> ···O2, H <sub>fw</sub> ···O4,<br>H1···O <sub>fw</sub> , H6···O <sub>fw</sub> |
| Config5              | -195.9        | -180.8        | H-bonds: H <sub>fw</sub> ···O2, H <sub>fw</sub> ···O4,<br>H1···O <sub>fw</sub>                        |
| Config6              | -188.9        | -172.3        | H-bonds: H <sub>fw</sub> ···O2, H <sub>fw</sub> ···O4,<br>H1···O <sub>fw</sub>                        |
| Config7              | -192.6        | -169.4        | H-bonds: H <sub>fw</sub> ···O2, H <sub>fw</sub> ···O4                                                 |
| Config8*             | -169.7        | -151.4        | H-bonds: H <sub>fw</sub> ···O2, H <sub>fw</sub> ···O4                                                 |
| Config9              | -164.3        | -154.6        | H-bonds: H <sub>fw</sub> ···O4, H3···O <sub>fw</sub>                                                  |
| Config10             | -165.5        | -151.7        | H-bonds: H <sub>fw</sub> ···O2, H <sub>fw</sub> ···O4,<br>H3···O <sub>fw</sub>                        |
| <b>H-FAU_32H_1_4</b> |               |               |                                                                                                       |
| Config1              | -196.1        | -178.4        | H-bonds: H <sub>fw</sub> ···O2, H <sub>fw</sub> ···O4,<br>H1···O <sub>fw</sub>                        |
| <b>Config2</b>       | <b>-194.2</b> | <b>-182.1</b> | H-bonds: H <sub>fw</sub> ···O2, H <sub>fw</sub> ···O4,<br>H1···O <sub>fw</sub>                        |
| Config3              | -196.3        | -180.9        | H-bonds: H <sub>fw</sub> ···O2, H <sub>fw</sub> ···O4,<br>H1···O <sub>fw</sub>                        |
| Config4              | -189.3        | -174.2        | H-bonds: H <sub>fw</sub> ···O2, H <sub>fw</sub> ···O4,<br>H1···O <sub>fw</sub> , H6···O <sub>fw</sub> |
| Config5              | -189.1        | -173.9        | H-bonds: H <sub>fw</sub> ···O2, H <sub>fw</sub> ···O4                                                 |
| Config6              | -187.6        | -174.2        | H-bonds: H <sub>fw</sub> ···O2, H <sub>fw</sub> ···O4,<br>H1···O <sub>fw</sub>                        |
| Config7              | -179.5        | -166.6        | H-bonds: H <sub>fw</sub> ···O2, H <sub>fw</sub> ···O4,<br>H1···O <sub>fw</sub> , H6···O <sub>fw</sub> |
| Config8              | -180.7        | -163.8        | H-bonds: H <sub>fw</sub> ···O2, H <sub>fw</sub> ···O4,<br>H1···O <sub>fw</sub>                        |
| Config9              | -179.2        | -164.3        | H-bonds: H <sub>fw</sub> ···O2, H <sub>fw</sub> ···O4,<br>H1···O <sub>fw</sub>                        |
| Config10             | -180.3        | -163.1        | H-bonds: H <sub>fw</sub> ···O2, H <sub>fw</sub> ···O4,<br>H1···O <sub>fw</sub>                        |

\*Configuration with hydrogen bonds involving protons of neighbouring 12MRs

## S2.2 – Internal energies of adsorption

**Table S5:** Internal energies of adsorption and upper and lower boundary values obtained from AIMD simulations.

|                       | $\Delta U_{ads}$<br>[kJ mol <sup>-1</sup> ] | $\Delta U_{ads,max}$<br>[kJ mol <sup>-1</sup> ] | $\Delta U_{ads,min}$<br>[kJ mol <sup>-1</sup> ] |
|-----------------------|---------------------------------------------|-------------------------------------------------|-------------------------------------------------|
| SiO <sub>2</sub> -FAU | -75.9                                       | -86.5                                           | -66.2                                           |
| H-FAU_1H              | -141.8                                      | -148.4                                          | -130.3                                          |
| H-FAU_2H_1_3          | -169.7                                      | -178.6                                          | -157.6                                          |
| H-FAU_2H_1_4          | -186.8                                      | -208.8                                          | -171.4                                          |
| H-FAU_32H_1_3         | -192.3                                      | -198.3                                          | -185.7                                          |

## S2.3 – Visualisation of additional low-energy configurations

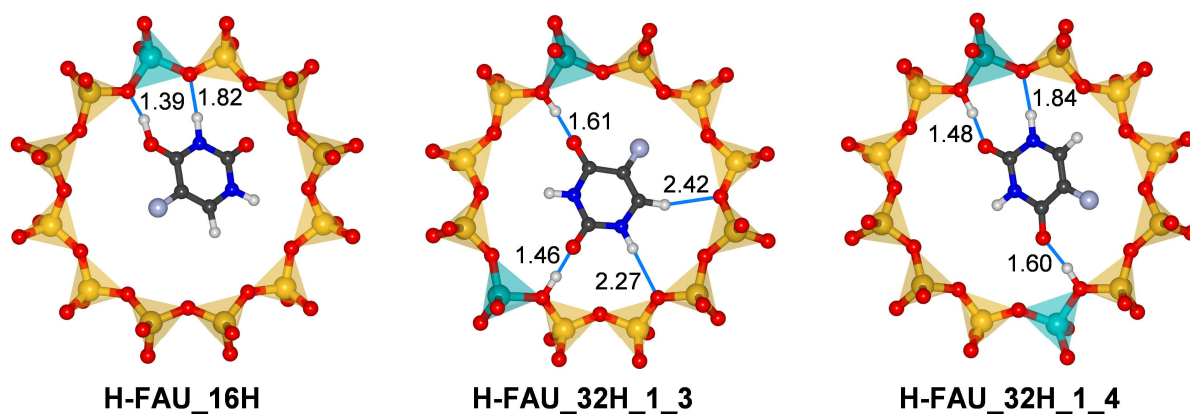

**Figure S1:** Lowest-energy configurations of 5-FU in additional FAU models not shown in **Figure 3**. Hydrogen bonds are displayed as blue lines, with distances given in Å.



## S2.4 – RDFs obtained from AIMD simulations of 5-FU@FAU

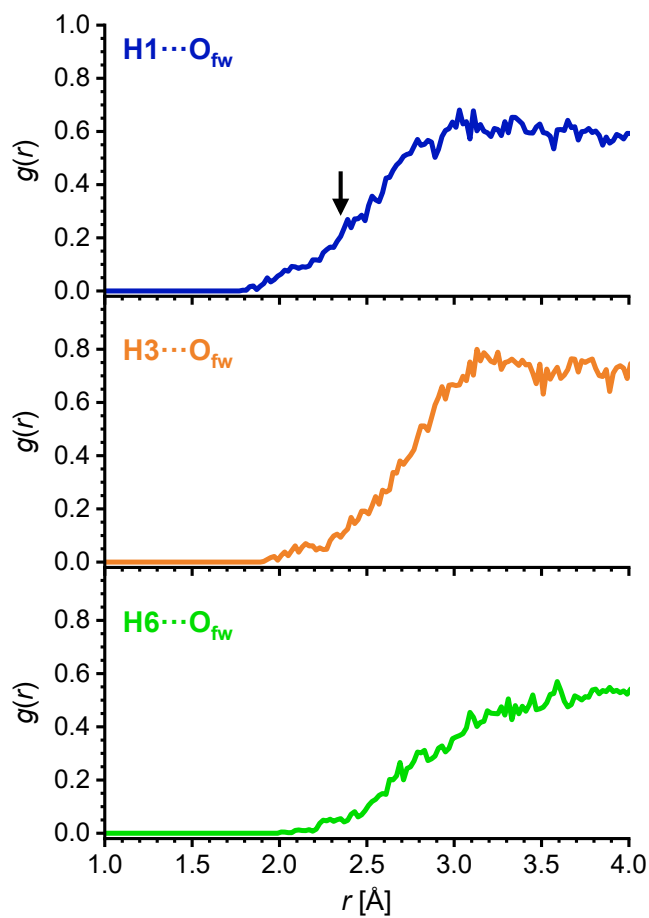

**Figure S2:** RDFs for selected combinations of atoms obtained from AIMD simulations of 5-FU@SiO<sub>2</sub>-FAU. The black arrow indicates the hydrogen bond distance in the DFT-optimised structure shown in **Figure 3** (top row, central panel).

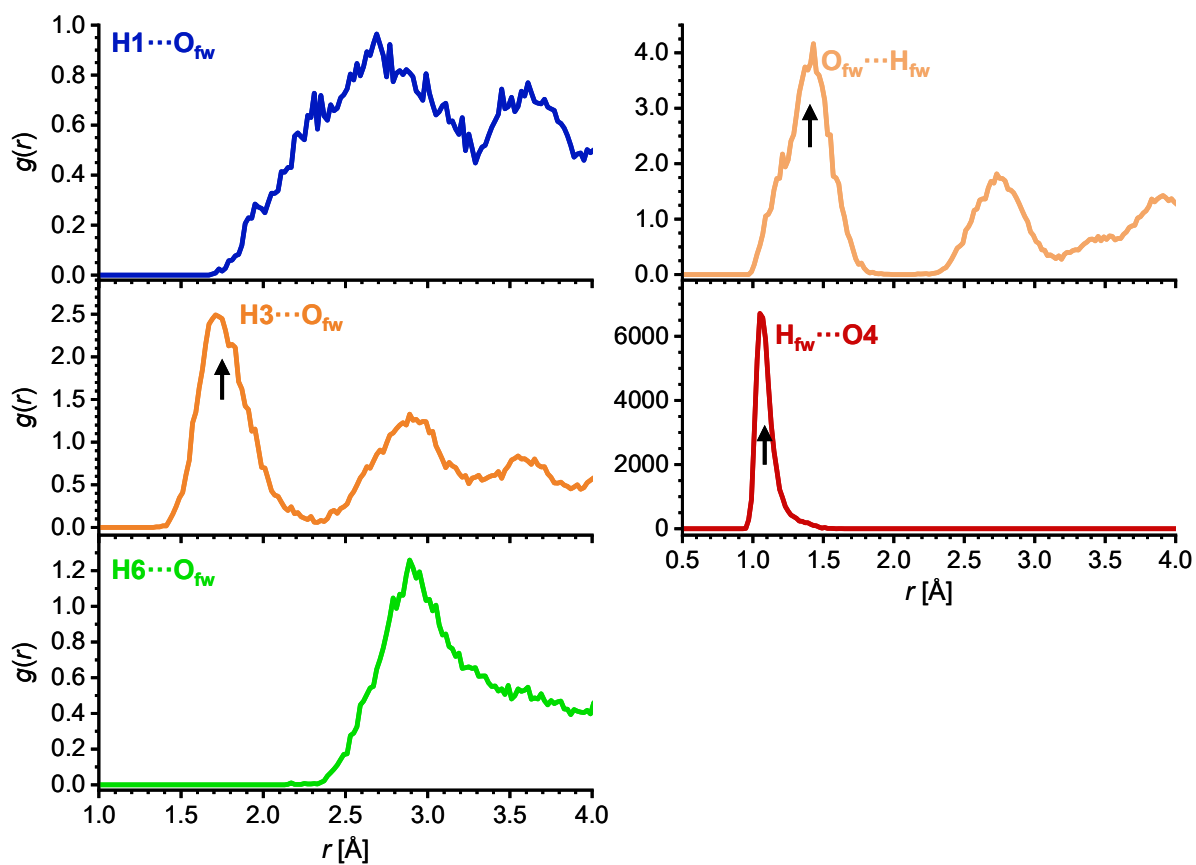

**Figure S3:** RDFs for selected combinations of atoms obtained from AIMD simulations of 5-FU@H-FAU\_1H. The black arrows indicate distances in the DFT-optimised structure shown in **Figure 3** (top row, right panel).

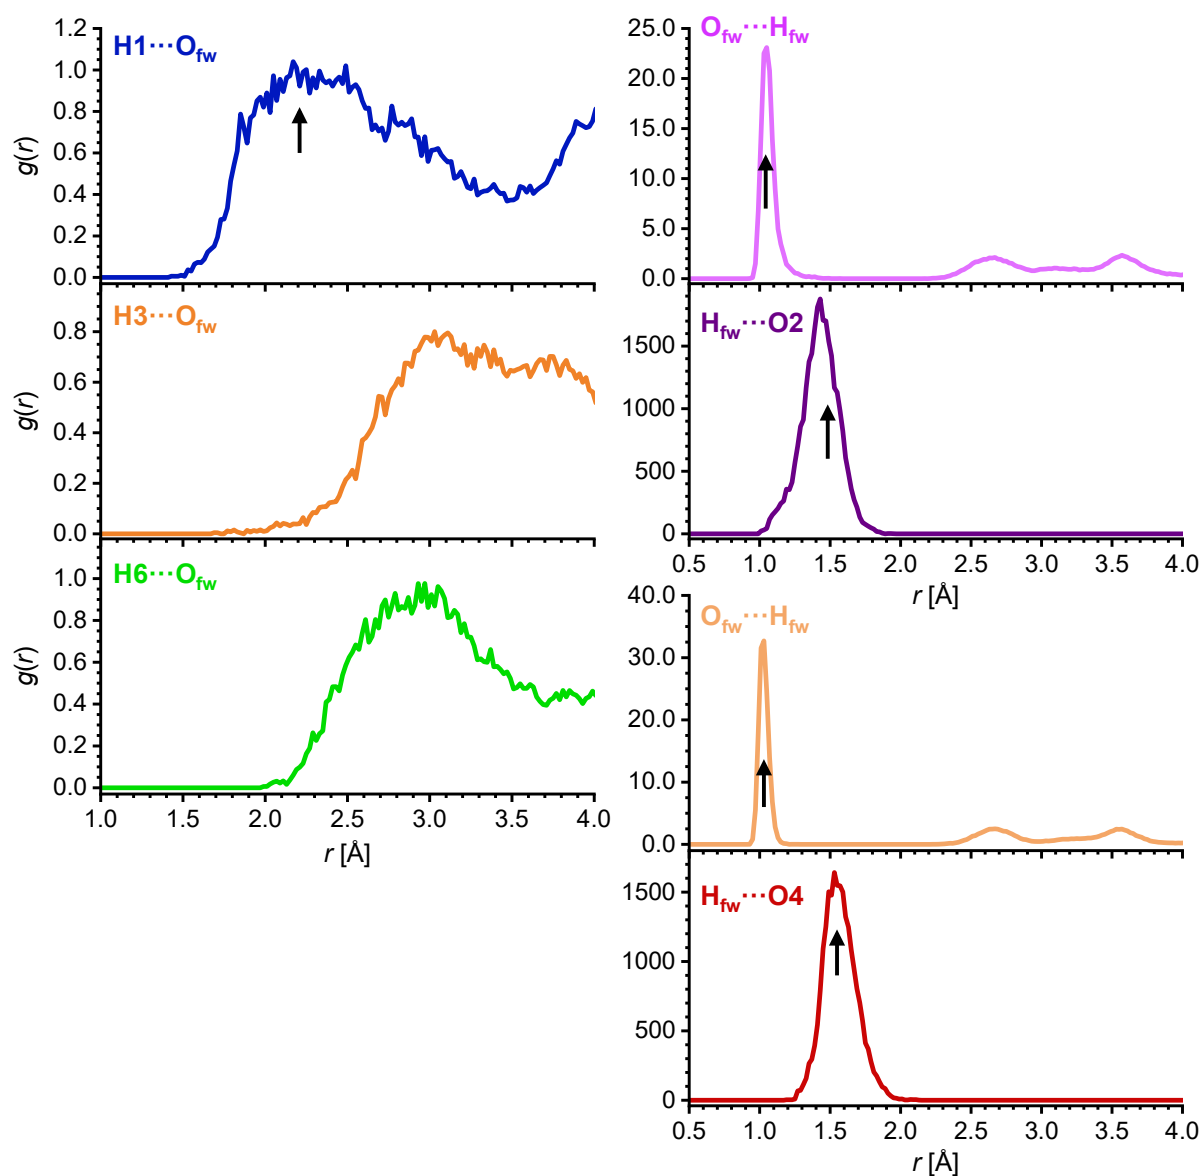

**Figure S4:** RDFs for selected combinations of atoms obtained from AIMD simulations of 5-FU@H-FAU\_2H\_1\_3. The black arrows indicate distances in the DFT-optimised structure shown in **Figure 3** (bottom row, left panel).

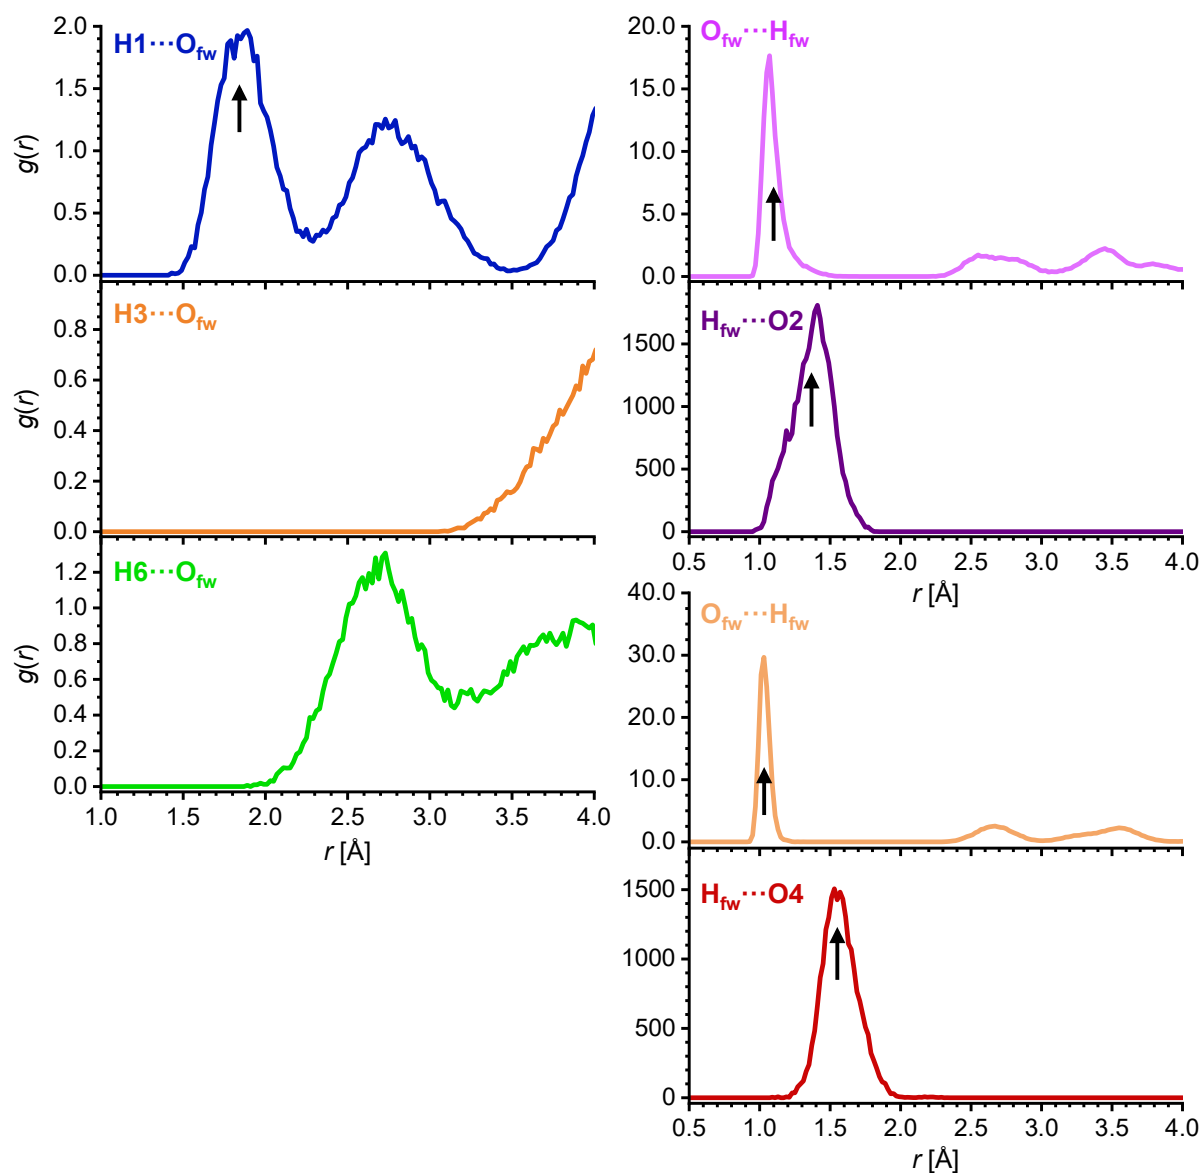

**Figure S5:** RDFs for selected combinations of atoms obtained from AIMD simulations of 5-FU@H-FAU\_2H\_1\_4. The black arrows indicate distances in the DFT-optimised structure shown in **Figure 3** (bottom row, central panel).

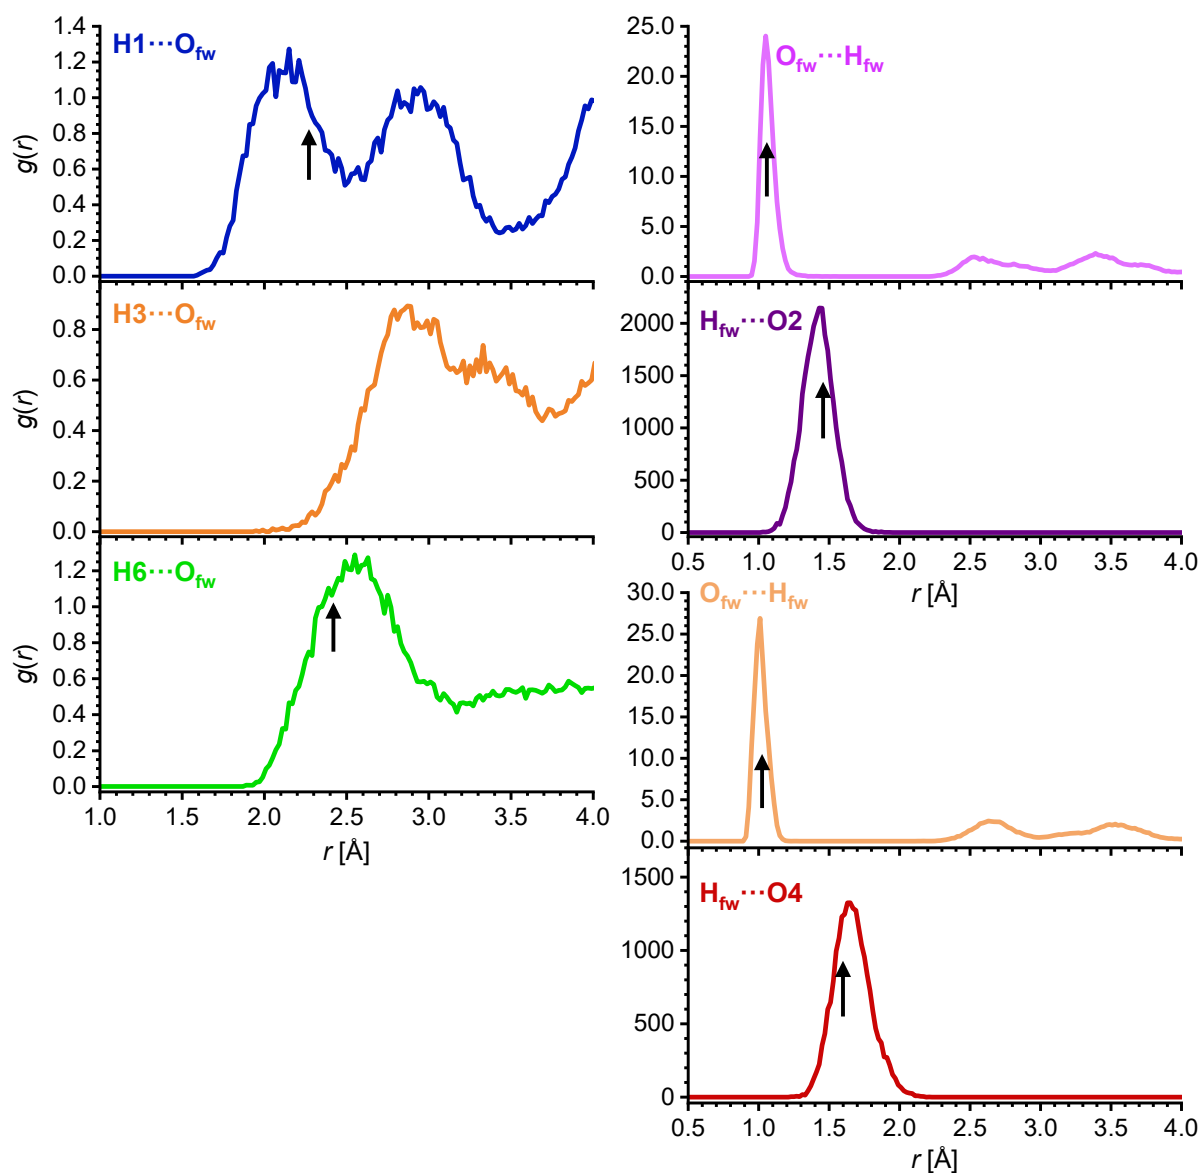

**Figure S6:** RDFs for selected combinations of atoms obtained from AIMD simulations of 5-FU@H-FAU\_32H\_1\_3. The black arrows indicate distances in the DFT-optimised structure shown in **Figure S1** (central panel).

## S2.5 – Partial charges of 5-FU

**Table S6:** DFT partial charges of the 5-FU molecule computed according to the Mulliken, Hirshfeld, and Restrained Electrostatic Potential (RESP) methods. Results obtained using the rev-vdW-DF2 functional and TZVP basis sets.

| Atom | Mulliken charge [e] | Hirshfeld charge [e] | RESP charge [e] |
|------|---------------------|----------------------|-----------------|
| N1   | -0.011              | -0.539               | -0.081          |
| H1   | 0.168               | 0.532                | 0.253           |
| C2   | 0.145               | 0.481                | 0.184           |
| O2   | -0.294              | -0.509               | -0.426          |
| N3   | -0.049              | -0.544               | -0.009          |
| H3   | 0.177               | 0.535                | 0.213           |
| C4   | 0.140               | 0.393                | 0.233           |
| O4   | -0.276              | -0.469               | -0.414          |
| C5   | 0.125               | 0.276                | 0.198           |
| F    | -0.196              | -0.329               | -0.168          |
| C6   | -0.023              | -0.283               | -0.138          |
| H6   | 0.094               | 0.465                | 0.154           |

## S2.6 – Intramolecular bond distances and vibrational modes

**Table S7: Top:** DFT-optimised Intramolecular bond distances of 5-FU and, where applicable, frequencies of stretching modes. **Bottom:** Frequencies of selected additional modes.

|                                           | Free 5-FU    |                              | 5-FU@ SiO <sub>2</sub> -FAU (Config2) |                              | 5-FU@ H-FAU_1H |                              | 5-FU@ H-FAU_2H_1_3 |                              |
|-------------------------------------------|--------------|------------------------------|---------------------------------------|------------------------------|----------------|------------------------------|--------------------|------------------------------|
|                                           | <i>d</i> [Å] | <i>v</i> [cm <sup>-1</sup> ] | <i>d</i> [Å]                          | <i>v</i> [cm <sup>-1</sup> ] | <i>d</i> [Å]   | <i>v</i> [cm <sup>-1</sup> ] | <i>d</i> [Å]       | <i>v</i> [cm <sup>-1</sup> ] |
| <b>N1-C2</b>                              | 1.398        |                              | 1.391                                 |                              | 1.404          |                              | 1.375              |                              |
| <b>C2-N3</b>                              | 1.395        |                              | 1.394                                 |                              | 1.415          |                              | 1.387              |                              |
| <b>N3-C4</b>                              | 1.417        |                              | 1.415                                 |                              | 1.360          |                              | 1.405              |                              |
| <b>C4-C5</b>                              | 1.458        |                              | 1.453                                 |                              | 1.428          |                              | 1.448              |                              |
| <b>C5=C6</b>                              | 1.352        | 1660                         | 1.355                                 | 1652                         | 1.364          | 1626                         | 1.360              | 1638                         |
| <b>C6-N1</b>                              | 1.383        |                              | 1.384                                 |                              | 1.368          |                              | 1.382              |                              |
| <b>N1-H1</b>                              | 1.018        | 3529                         | 1.023                                 | 3460                         | 1.023          | 3473                         | 1.031              | 3343                         |
| <b>C2=O2</b>                              | 1.224        | 1765                         | 1.232                                 | 1736                         | 1.216          | 1785                         | 1.246              | 1666                         |
| <b>N3-H3</b>                              | 1.023        | 3476                         | 1.024                                 | 3468                         | 1.057          | 2909                         | 1.028              | 3424                         |
| <b>C4=O4</b>                              | 1.226        | 1731                         | 1.230                                 | 1713                         | 1.288          | 1651                         | 1.241              | 1697                         |
| <b>C5-F</b>                               | 1.353        | 1232                         | 1.352                                 | 1238                         | 1.347          | 1260                         | 1.345              | 1252                         |
| <b>C6-H6</b>                              | 1.088        | 3174                         | 1.088                                 | 3168                         | 1.092          | 3136                         | 1.090              | 3157                         |
| <b>N1-H1 bending</b>                      |              | 1454                         |                                       | 1461                         |                | 1438                         |                    | 1466                         |
| <b>N-H bending &amp; ring deformation</b> |              | 1383                         |                                       | 1393                         |                | 1519                         |                    | 1409                         |
| <b>N3-H3 bending</b>                      |              | 1354                         |                                       | 1352                         |                | 1427                         |                    | 1367                         |
| <b>C6-H6 bending</b>                      |              | 1309                         |                                       | 1311                         |                | 1307                         |                    | 1316                         |

**Table S8:** DFT-calculated frequencies of modes in 1200 to 1800 cm<sup>-1</sup> range, compared to experimental results for 5-FU in Ar matrix and to previous DFT-B3LYP calculations, both from the work of Ivanov et al.,<sup>5</sup> and to experimental results obtained for solid 5-FU by Datt et al.<sup>6</sup>

|                                      | DFT This work                | Experiment 5-FU in Ar        | DFT B3LYP                    | Experiment Solid 5-FU        |
|--------------------------------------|------------------------------|------------------------------|------------------------------|------------------------------|
|                                      | <i>v</i> [cm <sup>-1</sup> ] |
| <b>C2=O2</b>                         | 1765                         | 1761                         | 1768                         | 1771                         |
| <b>C4=O4</b>                         | 1731                         | 1742                         | 1742                         | 1723                         |
| <b>C5=C6</b>                         | 1660                         | 1685                         | 1677                         | 1665                         |
| <b>N1-H1 bending</b>                 | 1454                         | 1472                         | 1471                         |                              |
| <b>N-H bending &amp; ring deform</b> | 1383                         | 1401                         | 1406                         |                              |
| <b>N3-H3 bending</b>                 | 1354                         | 1367                         | 1391                         |                              |
| <b>C6-H6 bending</b>                 | 1309                         | 1334                         | 1337                         |                              |
| <b>C5-F</b>                          | 1232                         | 1247                         | 1253                         | 1247                         |

## S2.7 – Initial structures used in AIMD simulations of (5-FU+16H<sub>2</sub>O)@FAU

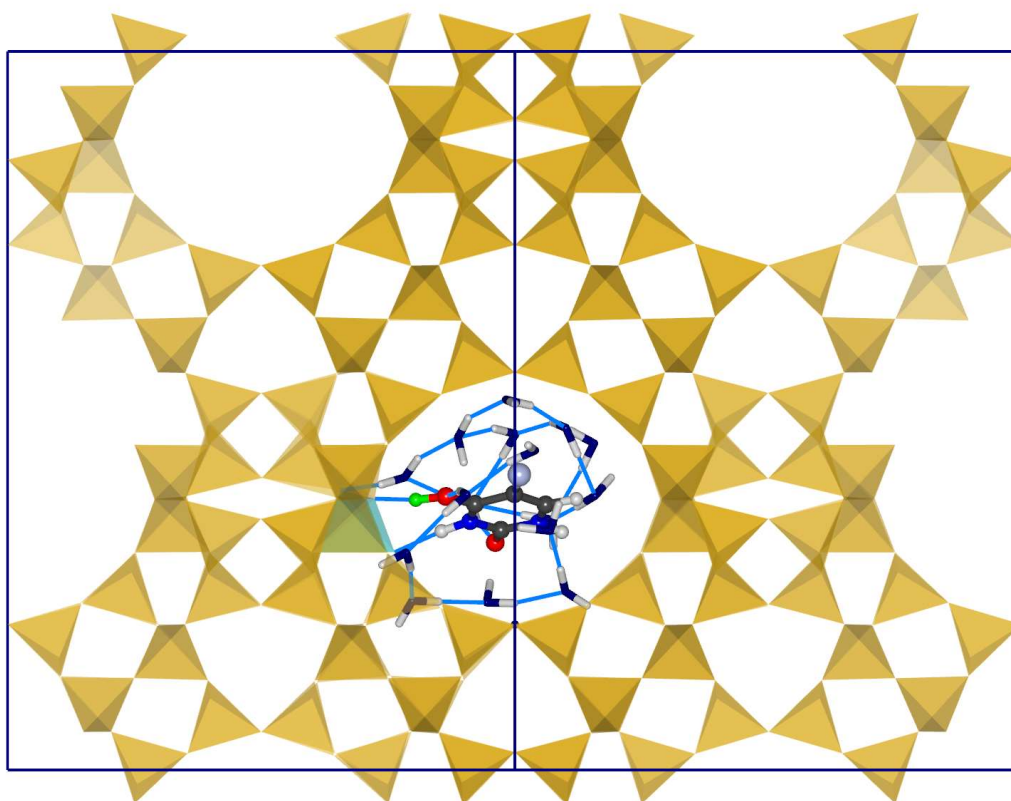

**Figure S7:** Starting structure of (5-FU+16H<sub>2</sub>O)@H-FAU\_1H used in AIMD simulations.



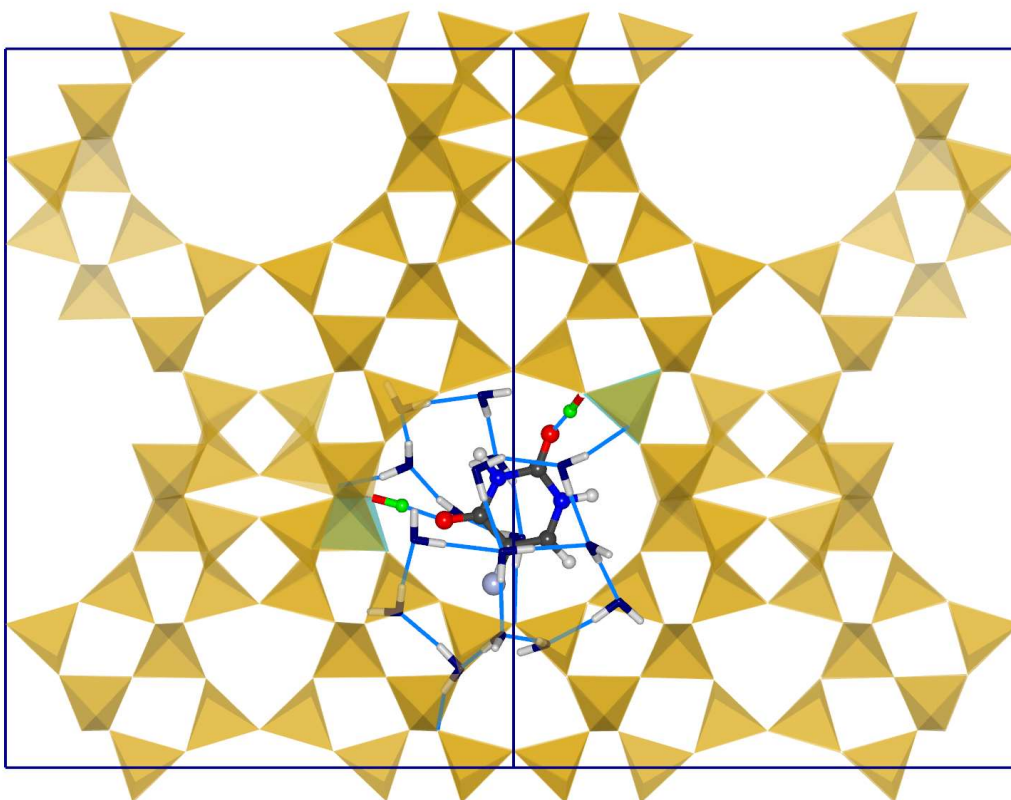

**Figure S8:** Starting structure of (5-FU+16H<sub>2</sub>O)@H-FAU\_2H\_1\_3 used in AIMD simulations.

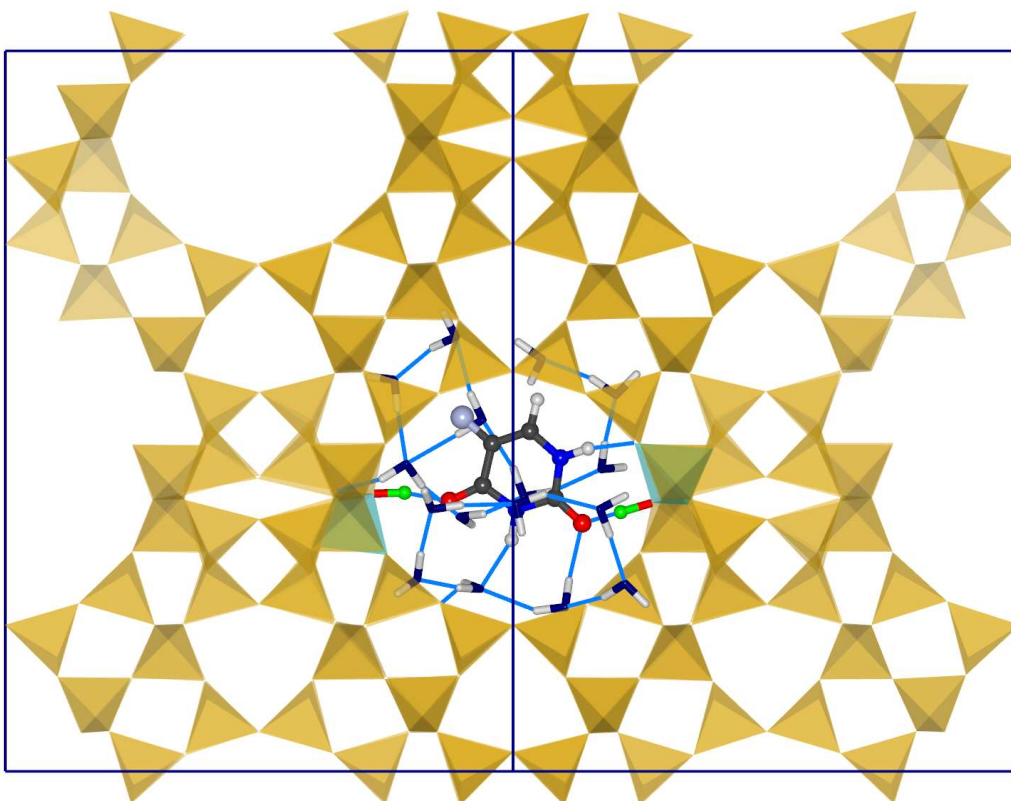

**Figure S9:** Starting structure of (5-FU+16H<sub>2</sub>O)@H-FAU\_2H\_1\_4 used in AIMD simulations.

## S2.8 – RDFs obtained from AIMD simulations of (5-FU+16H<sub>2</sub>O)@FAU

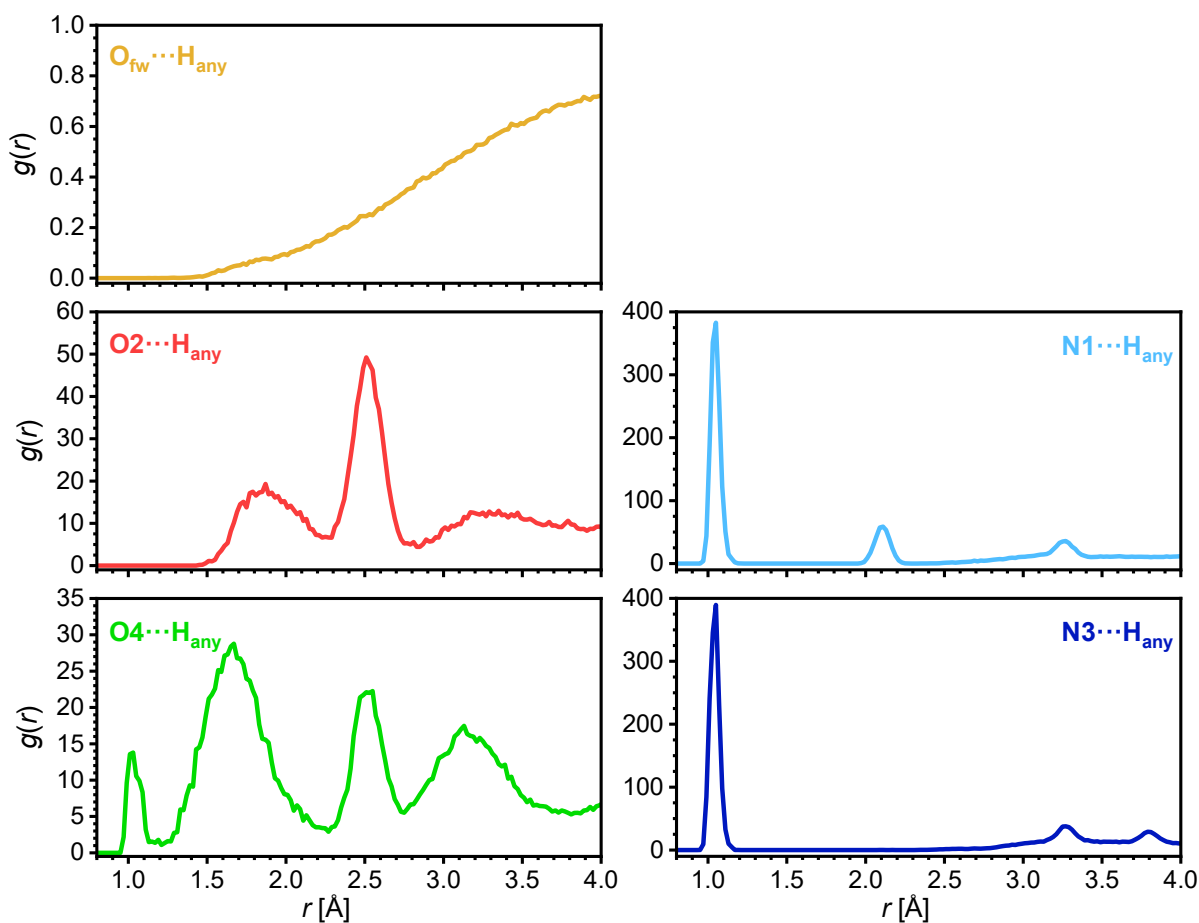

**Figure S10:** RDFs for selected combinations of atoms obtained from AIMD simulations of (5-FU+16H<sub>2</sub>O)@H-FAU\_1H. H<sub>any</sub> encompasses all hydrogen atoms in the system.

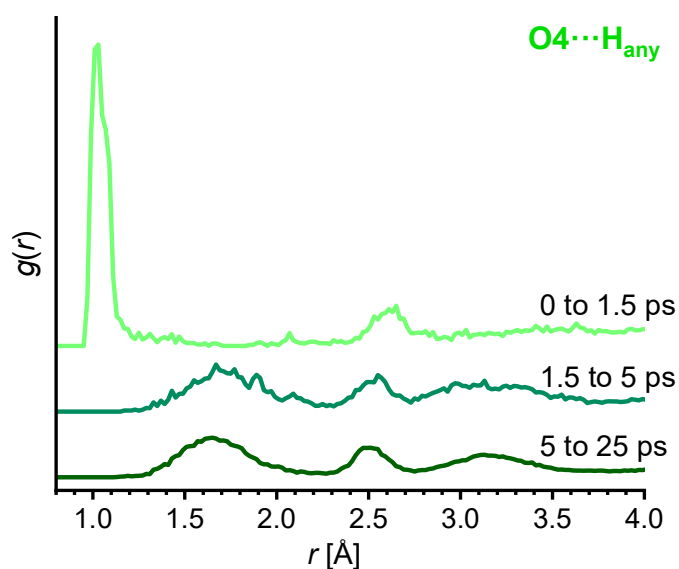

**Figure S11:** O4···H<sub>any</sub> RDFs obtained from AIMD simulations of (5-FU+16H<sub>2</sub>O)@H-FAU\_1H computed for distinct time intervals.

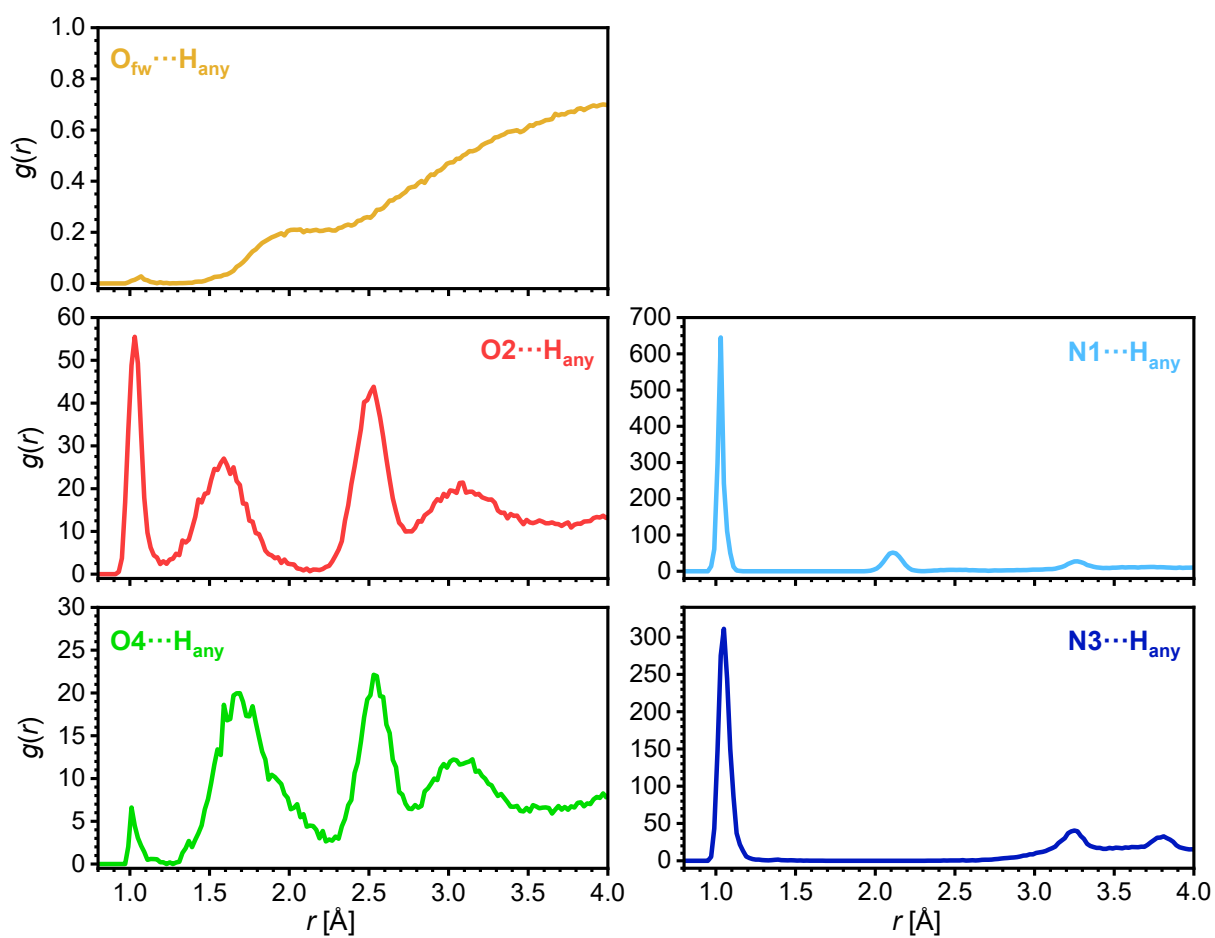

**Figure S12:** RDFs for selected combinations of atoms obtained from AIMD simulations of (5-FU+16H<sub>2</sub>O)@H-FAU\_2H\_1\_3.

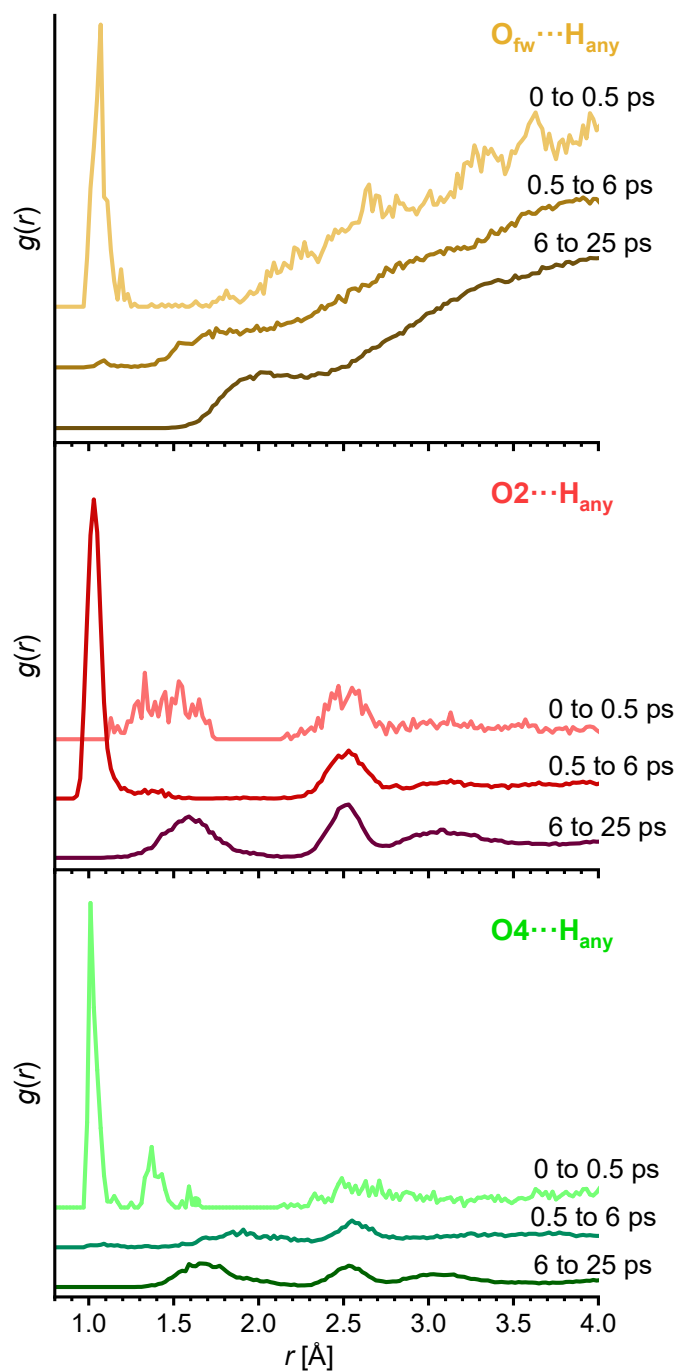

**Figure S13:** RDFs obtained from AIMD simulations of (5-FU+16H<sub>2</sub>O)@H-FAU\_2H\_1\_3 computed for distinct time intervals.

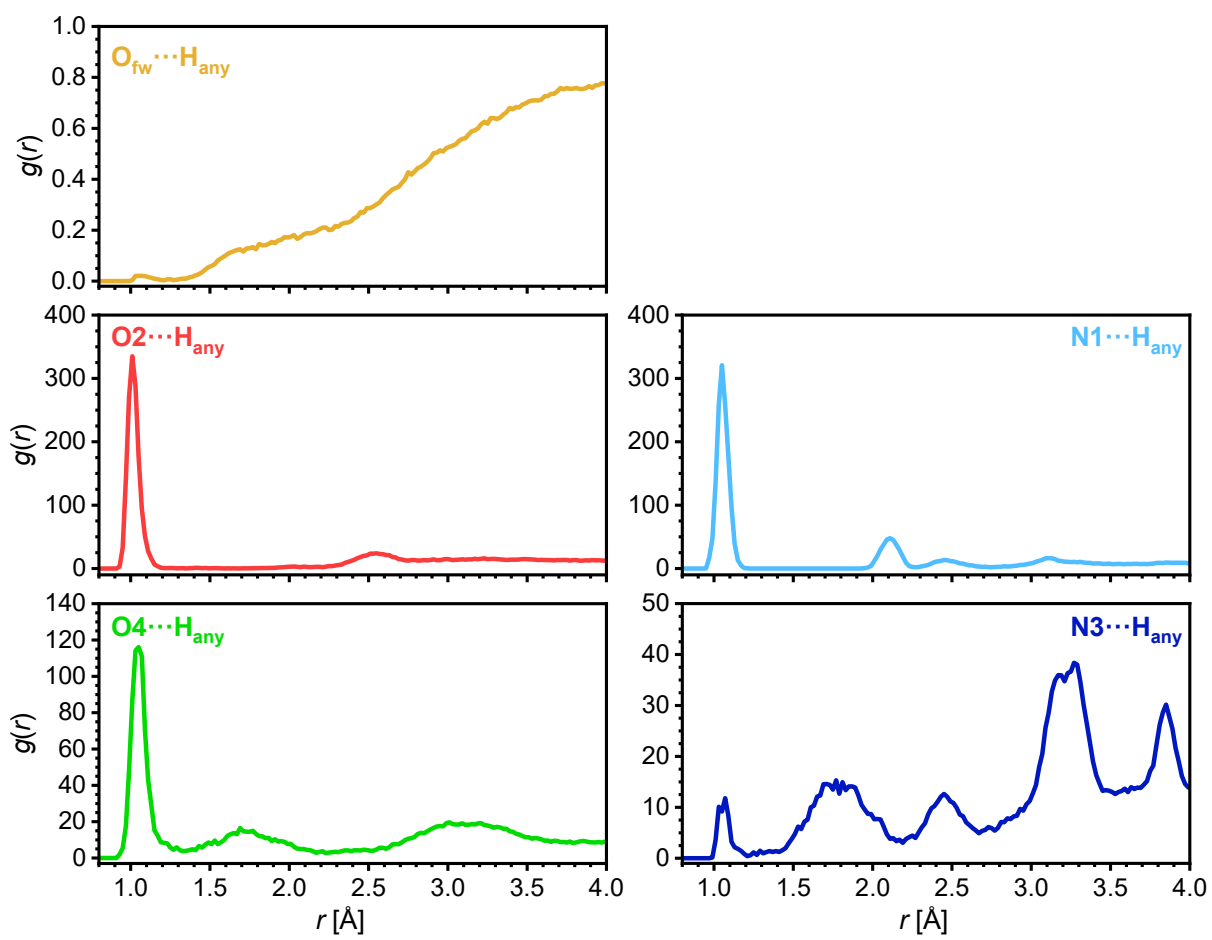

**Figure S14:** RDFs for selected combinations of atoms obtained from AIMD simulations of (5-FU+16H<sub>2</sub>O)@H-FAU\_2H\_1\_4.

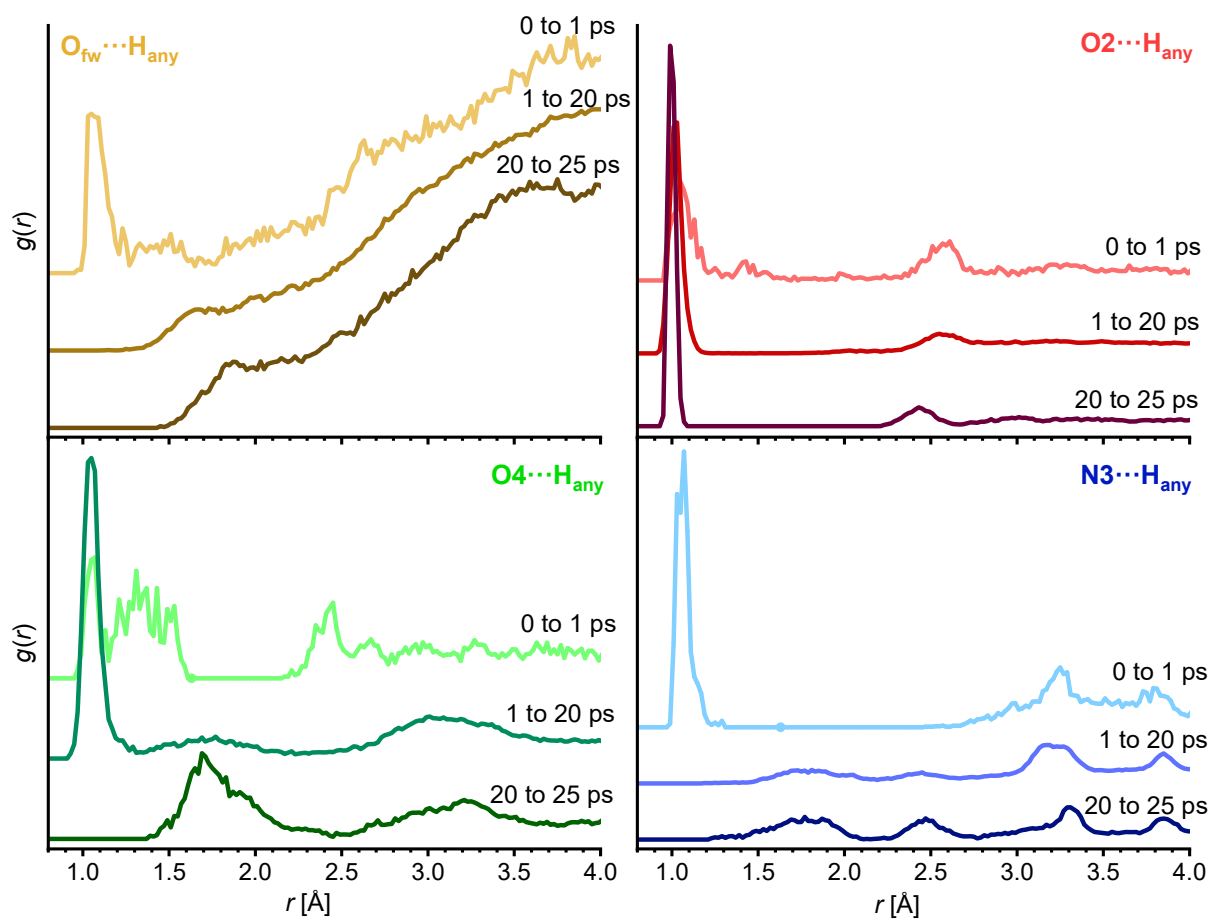

**Figure S15:** RDFs obtained from AIMD simulations of (5-FU+16H<sub>2</sub>O)@H-FAU\_2H\_1\_4 computed for distinct time intervals.

## S2.9 – RDFs obtained from AIMD simulations of 5-FU in water

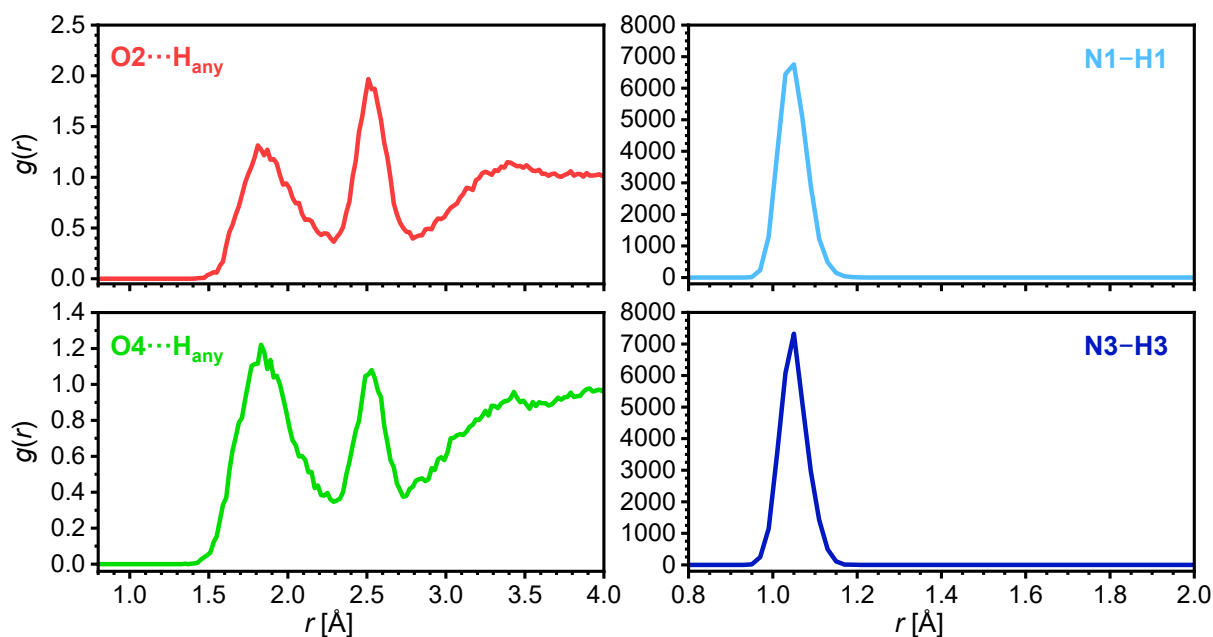

**Figure S16:** RDFs for selected combinations of atoms obtained from AIMD simulations of 5-FU in a box of 256 H<sub>2</sub>O molecules.

## References

- 1 H. Sun, S. J. Mumby, J. R. Maple and A. T. Hagler, *J. Am. Chem. Soc.*, 1994, **116**, 2978–2987.
- 2 M. Waldman and A. T. Hagler, *J. Comput. Chem.*, 1993, **14**, 1077–1084.
- 3 F. S. Emami, V. Puddu, R. J. Berry, V. Varshney, S. V. Patwardhan, C. C. Perry and H. Heinz, *Chem. Mater.*, 2014, **26**, 2647–2658.
- 4 C. Campaná, B. Mussard and T. K. Woo, *J. Chem. Theory Comput.*, 2009, **5**, 2866–2878.
- 5 A. Y. Ivanov, V. S. Leontiev, L. F. Belous, Y. V. Rubin and V. A. Karachevtsev, *Low Temp. Phys.*, 2017, **43**, 400–408.
- 6 A. Datt, E. A. Burns, N. A. Dhuna and S. C. Larsen, *Microporous Mesoporous Mater.*, 2013, **167**, 182–187.
